# Supplementary material for: Integrated analyses of single-cell transcriptome and Mendelian randomization reveal the protective role of FCRL3 in multiple sclerosis
Source: PubMed Central journal article supplement (PMC11284051; doi:10.3389/fimmu.2024.1428962), 2024-07-15
Supplement: Image_1.pdf [file Image_1.pdf]

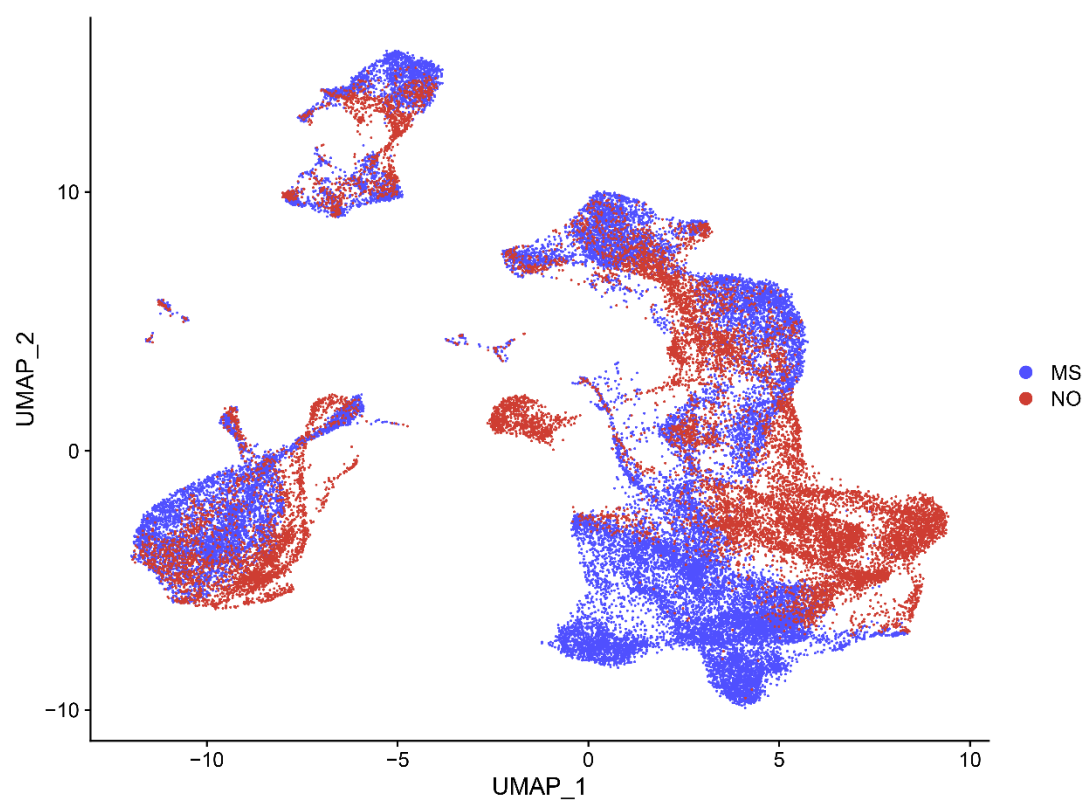

**Supplemental Figure 1.** Umap distribution map of multiple sclerosis and non-multiple sclerosis cells

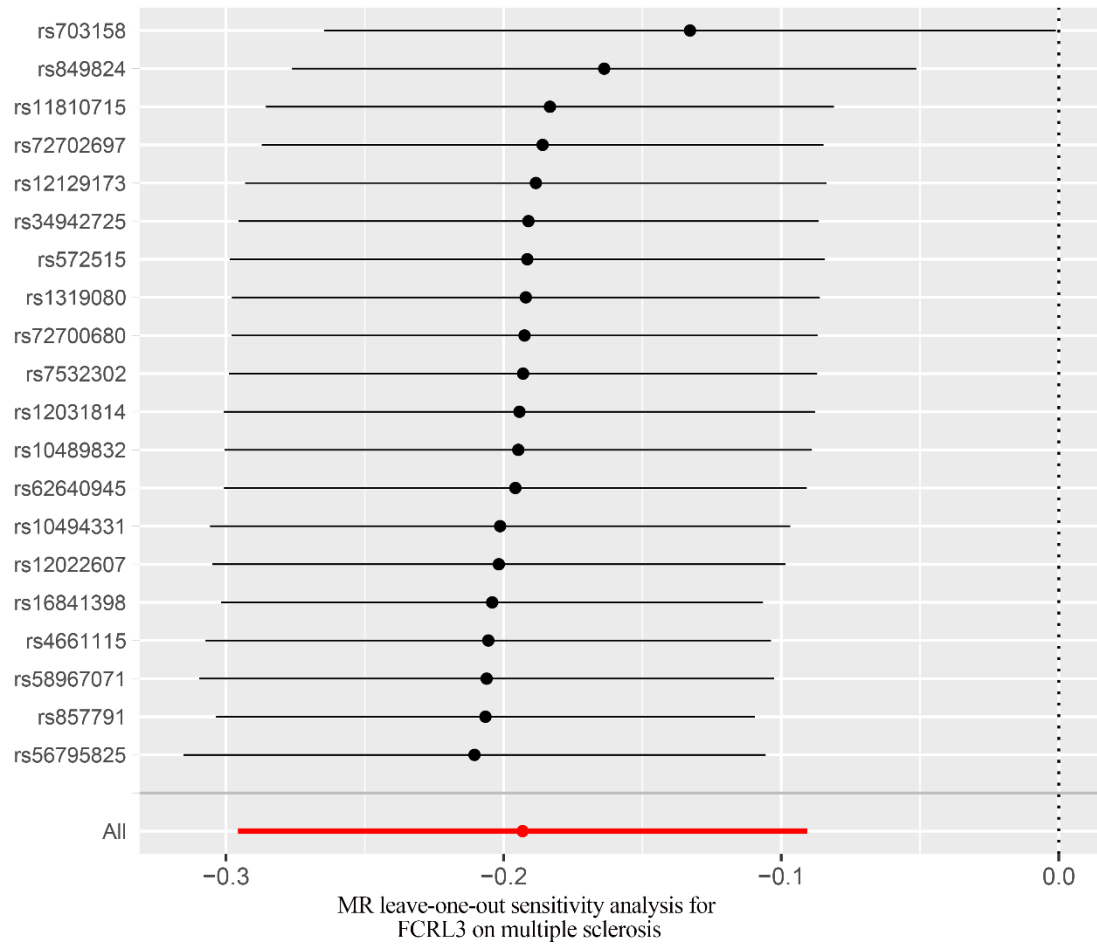

**Supplemental Figure 2.** MR results of leave-one-out sensitivity analysis for FCRL3 and multiple sclerosis

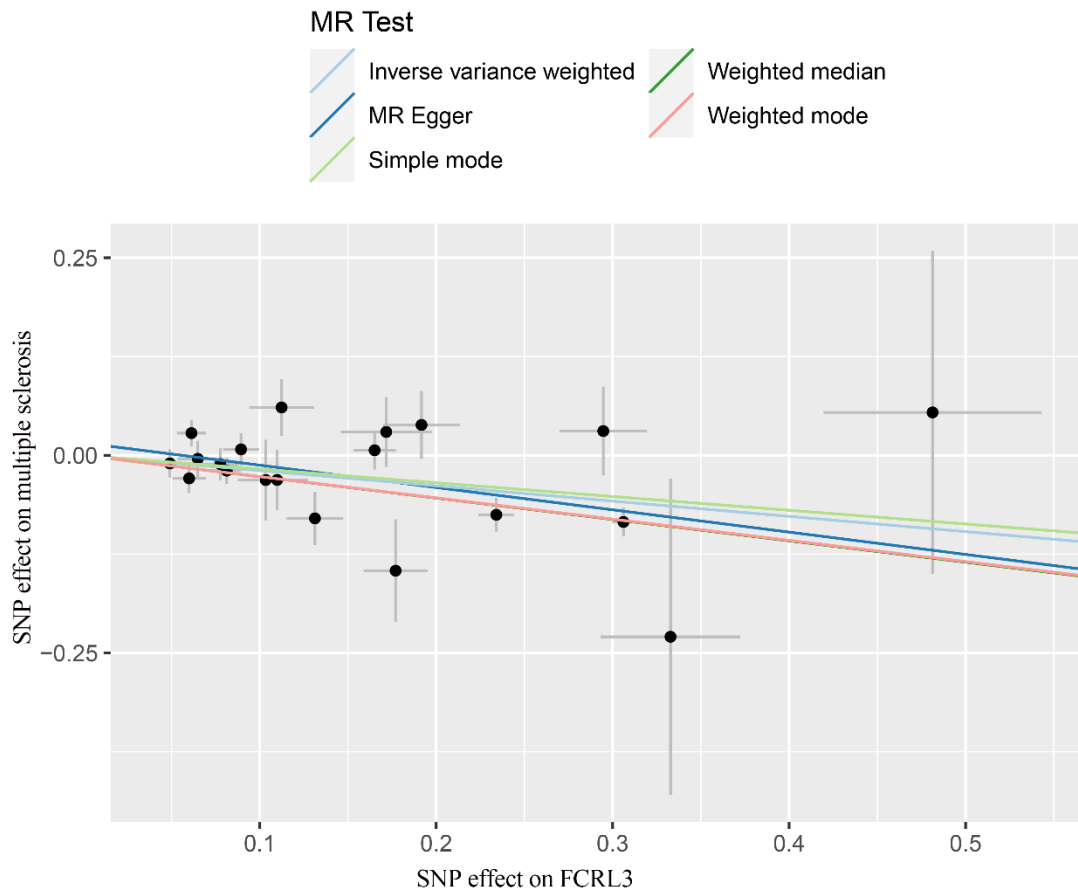

**Supplemental Figure 3.** Scatter plot of genetic correlations of FCRL3 and multiple sclerosis using different MR methods. The slopes of line represent the causal effect of each method, respectively

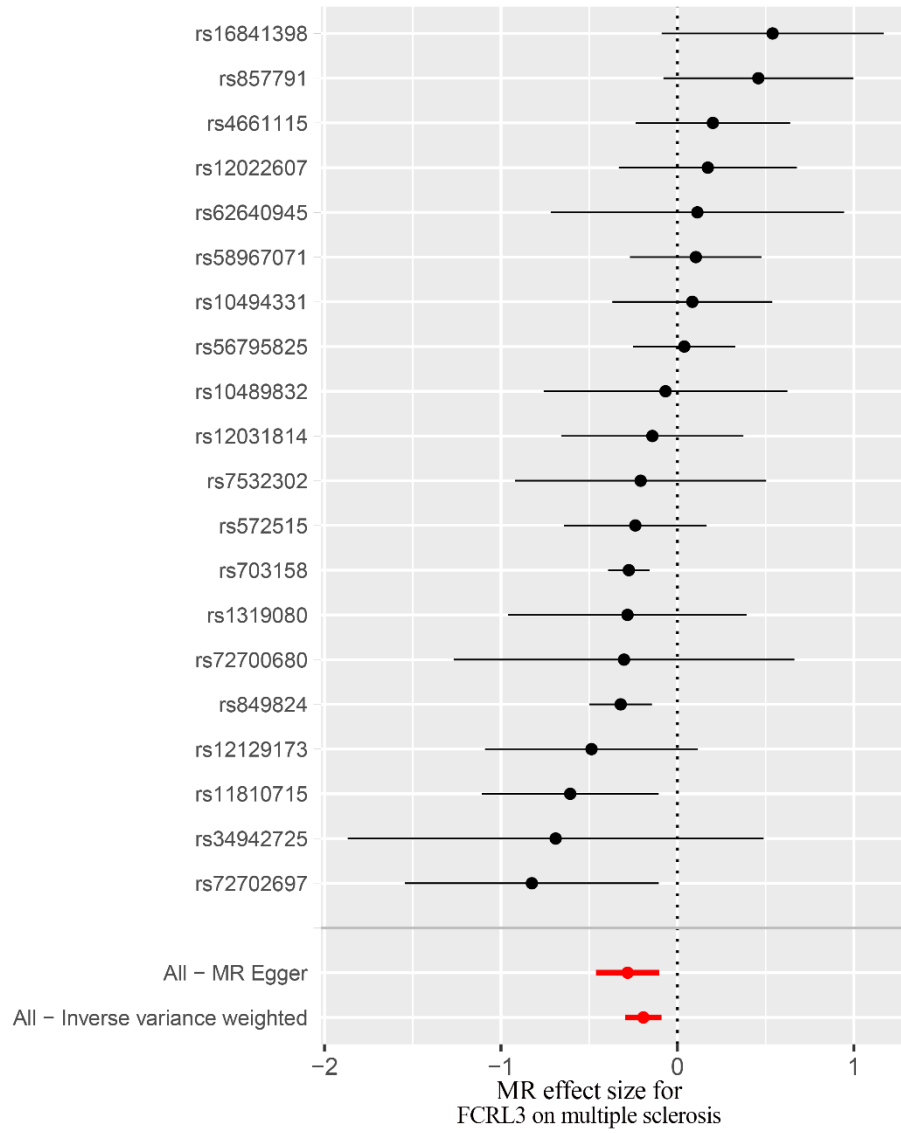

**Supplemental Figure 4.** Forest plot of the causal effects of FCRL3 associated SNPs on multiple sclerosis. The red and black dot/bar indicate the causal estimate of FCRL3 level on risk of patients with multiple sclerosis.
